# Supplementary material for: Identification and Comparative Genomic Analysis of Type VI Secretion Systems and Effectors in Klebsiella pneumoniae
Source: Front Microbiol. 2022 May 12;13:853744. doi: 10.3389/fmicb.2022.853744 (PMC9134191; doi:10.3389/fmicb.2022.853744)
Supplement: Supplementary file 4 [file Table_1.XLSX]

## Sheet: Sheet1
BioSample	Strains	Country	Isolation source	Host disease	Collection date	MLST	Level
SAMN10390469	33	Tanzania	feces	carriage	2010	76	complete
SAMN09912217	121	China	blood	Gastric cancer	2018	2570	complete
SAMN05231873	459	China	sputum	pneumonia	2008	37	complete
SAMN08391417	616	Iran	urine	urinary tract infection	2009	307	complete
SAMN08915824	3214	China	sputum	pneumonia	2017	23	complete
SAMN03067424	34618	USA	bodily fluid	pneumonia	2011	258	complete
SAMN14421539	47733	Czech Republic	Rectal swab	concussion	2018	147	complete
SAMN14421540	50595	Czech Republic	urine	hip replacement	2019	11	complete
SAMN14421541	51015	Czech Republic	Rectal swab	bile duct obstruction	2019	15	complete
SAMN09279554	160111	Taiwan	urine	Urinary tract infections	2014	11	complete
SAMN07484315	721005	China	urine	Paralysis	2013	11	complete
SAMN07508215	911021	China	urine	stroke	2014	11	complete
SAMN14168397	06KM907	Switzerland	Pus	Infection	2006	11	complete
SAMN14168398	11KM256	Switzerland	urine	Urinary tract infection	2011	11	complete
SAMN14333446	19KM1053	Switzerland	urine	Urinary tract infection	2019	11	complete
SAMN14333447	19KM1109	Switzerland	bile	Bacterial cholangitis	2019	11	complete
SAMN14333445	19KM267	Switzerland	urine	Urinary tract infection	2019	11	complete
SAMN16246721	33Kpn12	Colombia	Percutaneous abscess drainage	Site-operative infection	2015	504	complete
SAMN16246926	33Kpn22	Colombia	blood	Bacteremia	2015	258	complete
SAMN05412796	825795-1	Germany	anal swab	colonization	2014	147	complete
SAMN16705163	ATCC 43816	unknown	unknown	unknown	unknown	493	complete
SAMN02603941	ATCC 700721; MGH 78578		sputum	pneumonia	1994	38	complete
SAMN02152539	ATCC BAA-2146	USA	hospital patients	urinary tract infection	2010	11	complete
SAMN07503096	AUSMDU00003562	Australia	Sacral swab	Infection	2014	258	complete
SAMN07452764	AUSMDU00008079	Australia	Patient urine	Urinary tract infection	2012	258	complete
SAMN07503088	AUSMDU00008119	Australia	urine	Colonisation	2014	258	complete
SAMN17915080	B12097	India	blood	Bacteremia	2015	231	complete
SAMN18478480	B13243	India	blood	Bacteremia	2015	231	complete
SAMN17911845	B1347	India	blood	Bacteremia	2021	231	complete
SAMN17915099	B18064	India	blood	Bacteremia	2015	231	complete
SAMN17915109	B28484	India	blood	Bacteremia	2014	231	complete
SAMN17915140	B28906	India	blood	Bacteremia	2014	35	complete
SAMN18478623	B32278	India	blood	Bacteremia	2014	231	complete
SAMN18478625	B33769	India	blood	Bacteremia	2014	35	complete
SAMN17911903	B3824	India	blood	Bacteremia	2015	231	complete
SAMN17912169	B3923	India	blood	Bacteremia	2015	231	complete
SAMN18478563	B4650	India	blood	Bacteremia	2015	231	complete
SAMN17914336	B5617	India	blood	Bacteremia	2015	16	complete
SAMN17911762	B960	India	blood	Bacteremia	2021	231	complete
SAMN14402356	BA10835	India	blood	Bacteremia	2019	2096	complete
SAMN14402333	BA12818	India	blood	Bacteremia	2019	437	complete
SAMN10956433	BA1559	India	blood	Bacteremia	2018	15	complete
SAMN14402336	BA2105	India	blood	Bacteremia	2019	42	complete
SAMN08605586	BA2275	India	blood	Bacteremia	2018	11	complete
SAMN08389138	BA28434	India	blood	Bacteremia	2017	231	complete
SAMN10956502	BA34918	India	blood	Bacteremia	2017	23	complete
SAMN14402321	BA39649	India	blood	Bacteremia	2019	16	complete
SAMN10473953	BJCFK909	China	respiratory tract	pneumonia	2018	11	complete
SAMN02777842	blaNDM-1	USA	clinical urine culture	coronary graft	2012	395	complete
SAMN05149976	blood sample 2	Switzerland	blood	septicemia	2010	512	complete
SAMN10963497	BP327	India	blood	Bacteremia	2018	15	complete
SAMN14402341	BP3636	India	blood	Bacteremia	2019	2096	complete
SAMN06173549	BR21	Brazil	urine	urinary tract infection	2009	437	complete
SAMN06173548	BR7	Brazil	blood	bloodstream infection	2009	437	complete
SAMN10107914	BTS	Taiwan	blood	sepsis	2014	unknown	complete
SAMN16197931	C0674	Chile	blood	bacteremia	2017	25	complete
SAMN18160617	C2244	China	sputum	pneumonia	2017	11	complete
SAMN16093148	C39	China	infant sputum	cough	2019	37	complete
SAMN03024573	CAV1016	USA	Abdominal Abscess	Intra-abdominal infection	2007	45	complete
SAMN03024576	CAV1042	USA	urine	Urinary Tract Infection	2008	244	complete
SAMN03024585	CAV1217	USA	urine	Urinary Tract Infection	2010	340	complete
SAMN03024590	CAV1344	USA	urine	Urinary Tract Infection	2010	941	complete
SAMN03024610	CAV1392	USA	sputum	Pneumonia	2011	11	complete
SAMN09692822	CCRI-22199	Canada	anal sample	verification for resistant bacteria	2012	11	complete
SAMN07602587	CCUG 70742	Sweden	urine	acute cystitis	2012	147	complete
SAMN07811429	cr-hvkp3	China	blood	blood stream infection	2014	65	complete
SAMN11047257	CRKP I	India	blood	bacteremia	2018	11	complete
SAMN16604318	CRKP66R	China	induction culture	Intracranial injury	2020	11	complete
SAMN05908511	DA48896	Pakistan	Trachaeal secretion	Trachaeal secretion	2015	147	complete
SAMN15816123	ent1077	Singapore	Rectal Swab	Klebsiella infection	2014	65	complete
SAMN16085534	ENT1988	Singapore	Stool/Rectal Swab	Klebsiella colonization	2015	86	complete
SAMN08378650	F1	China	urine	pulmonary infection	2014	11	complete
SAMN08379292	F127	China	ascites	gaslrointestinal perforation	2014	11	complete
SAMN08380933	F13	China	urine	urinary infection	2014	661	complete
SAMN08380929	F132	China	end of the catheter	sepsis shock	2014	3684	complete
SAMN08380930	F138	China	blood	pulmonary infection	2014	11	complete
SAMN08378686	F5	China	sputum	pneumonia	2014	11	complete
SAMN08378909	F77	China	bile	abdominal infection	2014	11	complete
SAMN08380935	F81	China	incision secretion	skin and soft tissue infection	2014	3685	complete
SAMN08380938	F89-1	China	sputum	respiratory distress syndrome of newborn	2014	3686	complete
SAMN08380941	F93-1	China	sputum	pulmonary infection	2014	343	complete
SAMN08380932	F93-2	China	sputum	pulmonary infection	2014	17	complete
SAMN03996301	FDAARGOS_156	USA	urine	Urinary tract infection	2014	13	complete
SAMN07312490	FDAARGOS_446	Canada	rectal	Screening	2014	340	complete
SAMN05928590	GN-2	China	Drainage samples from liver abscess	Liver abscess	2015	485	complete
SAMN04244588	H11	China	separated from patient's sputum	pneumonia	2010	659	complete
SAMN15946735	HKP0018	Germany	rectal swab	colonization	2015	147	complete
SAMN15946737	HKP0067	Germany	rectal swab	colonization	2015	147	complete
SAMN02602959	HS11286	China	sputum	unknown	2011	11	complete
SAMN08135572	HZW25	China	blie	Acute cholangitis	2016	34	complete
SAMN06112222	INF277	Australia	BAL	pneumonia	2014	323	complete
SAMN06112228	INF333	Australia	sputum	pneumonia	2014	323	complete
SAMN17897699	IRQBAS102c	Iraq	burn wounds	burn wound	2015	1731	complete
SAMN17976248	JNQH116	China	cerebrospinal fluid	meningitis	2020	412	complete
SAMN18106513	JS161205112	China	sputum	pneumonia	2016	65	complete
SAMN09638204	KC-Pl-HB1	South Korea	blood	Septicemia	2017	375	complete
SAMN05412452	Kp_Goe_121641	Germany	urine sample	Urinary tract infection	2013	101	complete
SAMN05412458	Kp_Goe_149473	Germany	tracheal secretion	pneumonia	2014	147	complete
SAMN05412459	Kp_Goe_149832	Germany	abdominal drain fluid	peritonitis	2014	147	complete
SAMN05412803	Kp_Goe_152021	Germany	abdominal drainage fluid	peritonitis	2014	147	complete
SAMN05412805	Kp_Goe_154414	Germany	wound swab	wound (hand)	2014	23	complete
SAMN05412455	Kp_Goe_33208	Germany	wound swab	wound infection	2013	101	complete
SAMN05412811	Kp_Goe_62629	Germany	urine	urinary tract infection	2015	395	complete
SAMN05412456	Kp_Goe_71070	Germany	urine sample	Urinary tract infection	2013	101	complete
SAMN05412457	Kp_Goe_821588	Germany	anal swab	colonization	2014	11	complete
SAMN05412444	Kp_Goe_822579	Germany	nose	colonization	2013	147	complete
SAMN05412453	Kp_Goe_822917	Germany	skin swab	colonization	2013	11	complete
SAMN05412797	Kp_Goe_827024	Germany	abdominal drainage fluid	peritonitis	2014	147	complete
SAMN05412802	Kp_Goe_827026	Germany	nasal swab	colonization	2014	147	complete
SAMN05412804	KP_Goe_828304	Germany	anal swab	colonization	2014	147	complete
SAMN15903654	KP120	China	bile	biliary tract infection	2011	37	complete
SAMN15052358	KP1517	China	urine	Urinary tract infections	2018	11	complete
SAMN10439690	KP17-15	China	blood	pulmonary infection	2017	15	complete
SAMN10439712	KP17-16	China	sputum	pneumoconiosis	2017	15	complete
SAMN14132403	KP18-2079	China	blood	epilepsy	2018	11	complete
SAMN10497376	KP18-29	China	urine	Bladder Cancer	2018	11	complete
SAMN13978114	KP18-3-8	China	urine	Respiratory Diseases	2018	11	complete
SAMN13663554	KP19-2029	China	blood	Cervical and waist syndrome	2019	11	complete
SAMN16418109	KP19-3023	China	sputum	cirrhosis and hepatitis	2019	2667	complete
SAMN16418314	KP19-3088	China	blood culture from maile	Leukemia	2019	2667	complete
SAMN12307651	KP2	USA	urine	sepsis	2017	16	complete
SAMN15186437	KP20194a	China	sputum	Pneumoniae	2019	11	complete
SAMN15186439	KP20194b	China	sputum	Pneumoniae	2019	11	complete
SAMN15186440	KP20194b2	China	sputum	Pneumoniae	2019	11	complete
SAMN15186441	KP20194c	China	sputum	Pneumoniae	2019	11	complete
SAMN15186442	KP20194c3	China	bed sheets	Pneumoniae	2019	11	complete
SAMN15186445	KP20194d	China	sputum	Pneumoniae	2019	11	complete
SAMN15186446	KP20194e	China	sputum	Pneumoniae	2019	11	complete
SAMN05928542	KP36M	Taiwan	urine	acute pyelonephritis	2012	15	complete
SAMN16933269	KP47693	Czech Republic	swab from around the abdominal drainage	Idiopathic acute pancreatitis	2018	101	complete
SAMN03770912	KP5	Singapore	hospital	Colonization	2014	147	complete
SAMN16933286	KP51069	Czech Republic	urine	Low back pain	2019	512	complete
SAMN16933289	KP51248	Czech Republic	rectal swab	Unspecified infectious diseases	2019	101	complete
SAMEA3283117	Kp52.145	Indonesia	unknown	unknown	1935	66	complete
SAMN16933298	KP52810	Czech Republic	pressure ulcer swab	Acute respiratory failure	2019	11	complete
SAMN16933300	KP52813	Czech Republic	sputum	Chronic respiratory failure	2019	846	complete
SAMN12228410	KP58	China	urine	Pulmonary infection	2018	11	complete
SAMN04044480	KP617	Korea	Burn Patient	Bacterial Pneumonia	2013	14	complete
SAMN12813532	KP65	China	urine	urinary tract infection	2018	11	complete
SAMN11105635	KP-8788	Italy	blood	Renal Transplantation	2017	258	complete
SAMN16933304	KPA4411	Czech Republic	endotracheal cannula	Chronic respiratory failure	2019	11	complete
SAMN16933305	KPA9853	Czech Republic	urine	Acute pancreatitis	2019	101	complete
SAMN11246288	KPC160117	Taiwan	urine	urinary tract infections	2014	11	complete
SAMN11246289	KPC160121	Taiwan	pus	pneumonia	2015	11	complete
SAMN11246290	KPC160125	Taiwan	urine	urinary tract infections	2015	11	complete
SAMN11246291	KPC160132	Taiwan	blood	bacteremia	2015	11	complete
SAMN08582315	KPHS1249	China	wound	wood infection	2008	23	complete
SAMN16685805	KPN110	Australia	urine	urinary tract infection	2017	323	complete
SAMN16685806	KPN114	Australia	urine	urinary tract infection	2017	29	complete
SAMN06438459	KPN1482	USA	respiratory	Klebsiella Infections	2014	37	complete
SAMN06437491	KPN528	USA	respiratory	Klebsiella Infections	2012	258	complete
SAMN02820977	KPNIH30	USA	perirectal swab	pneumoniae	2013	258	complete
SAMN11835544	KpvST147B_SE1_1_NDM	United Kingdom	rectal swab	screen	2019	147	complete
SAMN11793565	KpvST15_NDM	United Kingdom	throat	screen	2016	15	complete
SAMN07738870	KSB1_1B	Australia	Rectal swab	Asymptomatic carriage	2013	1213	complete
SAMN06112200	KSB1_1H	Australia	rectal swab	carriage	2014	323	complete
SAMN06112194	KSB1_5B	Australia	rectal swab	carriage	2013	15	complete
SAMN06112197	KSB1_5D	Australia	rectal swab	carriage	2013	340	complete
SAMN06112204	KSB1_6J	Australia	rectal swab	carriage	2014	323	complete
SAMN06112206	KSB2_9B	Australia	rectal swab	carriage	2014	25	complete
SAMN13503954	KUH-KPNHVF1	South Korea	liver abscess	Liver abscess	2017	23	complete
SAMN13503956	KUH-KPNHVL1	South Korea	stool	Liver abscess	2017	23	complete
SAMN10433884	L39_2	China	stool	diarrhoea	2018	11	complete
SAMN10434199	L482	China	stool	diarrhea	2017	11	complete
SAMN10721859	LH102-A	Laos	stool	asymptomatic	2012	87	complete
SAMN10724437	LH375	Laos	stool	asymptomatic	2012	1315	complete
SAMN10740431	LH94	Laos	stool	asymptomatic	2012	39	complete
SAMN11602135	LSH-KPN148	China	sputum	Severe pneumonia	2015	11	complete
SAMN11634268	LSH-KPN25	China	sputum	Diabetes	2011	11	complete
SAMN16386297	MAR14-456	Russia	Postoperative wound	Sepsis	2014	23	complete
SAMN10662038	NB5306	China	blood	bloodstream infection	2014	437	complete
SAMN08022168	NH25	Thailand	sputum	Klebsiella pneumoniae	2016	15	complete
SAMN10531975	NH34	Thailand	sputum	Gastroenteritis	2014	14	complete
SAMN08026708	NH54	Thailand	rectal swab	Klebsiella pneumoniae	2016	147	complete
SAMN11270035	NICU_2_P7	Israel	rectal	Healthy	2017	37	complete
SAMD00060934	NTUH-K2044	China	blood	liver abscess	2005	23	complete
SAMN04421276	NUHL24835	China	urine	urine with mucoviscosity phenotype	2014	14	complete
SAMN10986063	P094-1	China	sputum	disease o respiratory system	2013	2268	complete
SAMN05231874	P1428	China	sputum	pneumonia	2007	23	complete
SAMN14770898	P35	Brazil	blood	Bloodstream infection	2015	15	complete
SAMN02885365	PMK1	Nepal	blood	Klebsiella pneumoniae [K. pneumoniae] as the cause of diseases classified elsewhere	2011	15	complete
SAMN12559024	QD23	China	urine	Fever	2015	1	complete
SAMN06200334	RJA166	China	sputum	heart disease	2015	23	complete
SAMN04377969	RJF293	China	blood	Gastric remnant cancer	2014	374	complete
SAMN04377968	RJF999	China	blood	Coronary heart disease	2015	23	complete
SAMN12085403	RJY9645	China	blood	Pneumonia	2016	35	complete
SAMN18096031	SA-KpST14	Saudi Arabia	blood	Right-Sided Infective Endocarditis	2019	14	complete
SAMN14482422	SCH6109	China	urine	Bloodstream infection	2016	37	complete
SAMN04917370	SKGH01	United Arab Emirates	Urine sample	UTI	2015	147	complete
SAMN11054834	ST23	USA	urine	urinary tract infection	2016	23	complete
SAMN07421000	ST307PT01	South Korea	sputum	Pneumonia	2014	307	complete
SAMN07421004	ST307PT02	South Korea	sputum	Pneumonia	2014	307	complete
SAMN07421005	ST307PT03	South Korea	sputum	Pneumonia	2015	307	complete
SAMN07421006	ST307PT04	South Korea	Rectal swab	Pneumonia	2015	307	complete
SAMN06109054	SWU01	China	blood specimen	infection	2015	11	complete
SAMN04087462	TGH10	Greece	wound swab	pneumoniae	2013	383	complete
SAMN04087463	TGH13	Greece	rectal	pneumoniae	2013	147	complete
SAMN04087461	TGH8	Greece	CVC	pneumoniae	2011	383	complete
SAMN10740630	TH164	Thailand	stool	asymptomatic	2012	873	complete
SAMN13161584	TK421	USA	blood	bacteremia	2013	unknown	complete
SAMN07672549	TVGHCRE225	Taiwan	intraabdominal abscess	sepsis	2014	11	complete
SAMN04008892	UCLAOXA232KP	USA	abdominal drainage	end-stage liver disease	2014	16	complete
SAMN04008893	UCLAOXA232KP	USA	Rectal	CRE Colonization	2015	16	complete
SAMN04008891	UCLAOXA232KP_Pt0	USA	respiratory	Aspiration pneumonia	2014	16	complete
SAMN07572687	VBA2172	India	blood	Bacteremia	2016	231	complete
SAMN06019523	WCHKP095845	China	sputum	Pneumoniae	2016	1	complete
SAMN02649400	XH209	China	blood	Pneumonia	2013	17	complete
SAMN09977093	XJ-K1	China	urine	Benign prostatic hyperplasia	2018	11	complete
SAMN09988182	XJ-K2	China	blood	blood stream infections	2018	11	complete
SAMN12877722	YML0508	China	rectum	myelodysplasia syndrome (MDS) and acute myeloblastic leukemia (AML-M2)	2018	17	complete
SAMN14411773	ZRKP01	China	sputum	Pneumonia	2019	11	complete
SAMN14411774	ZRKP02	China	sputum	Pneumonia	2019	11	complete
SAMN14411775	ZRKP03	China	bronchoalveolar lavage	Pneumonia	2019	11	complete
SAMN14411776	ZRKP04	China	bronchoalveolar lavage	Pneumonia	2019	11	complete
SAMN24664061	21	China	blood	unknown	2017	11	draft
SAMN24664090	26	China	sputum	Pneumoniae	2020	1079	draft
SAMN24664235	45	China	blood	bloodstream infection	2017	11	draft
SAMN24665246	47	China	blood	cholecystolithiasis	2017	309	draft
SAMN24665686	49	China	blood	hilar cholangiocarcinoma	2017	4845	draft
SAMN24665688	55	China	blood	bloodstream infection	2017	65	draft
SAMN24665696	101	China	blood	Bacteremia	2020	11	draft
SAMN24667378	103	China	blood	Bacteremia	2020	11	draft
SAMN24667379	104	China	blood	Bacteremia	2020	11	draft
SAMN24667606	105	China	blood	Bacteremia	2020	11	draft
SAMN24667607	106	China	blood	Bacteremia	2020	11	draft
SAMN24667608	107	China	blood	Bacteremia	2020	11	draft
SAMN24667609	108	China	blood	Bacteremia	2020	14	draft
SAMN24665690	110	China	blood	bloodstream infection	2018	11	draft
SAMN24665694	112	China	blood	bloodstream infection	2018	11	draft
SAMN24667610	201	China	blood	Bacteremia	2020	11	draft
SAMN24669134	946	China	sputum	Pneumoniae	2021	11	draft
SAMN24665699	1021	China	blood	Bacteremia	2020	11	draft
SAMN24665827	1022	China	blood	Bacteremia	2020	11	draft
SAMN24663454	1825	China	sputum	Pneumoniae	2020	11	draft
SAMN24668372	HD006	China	sputum	Pneumoniae	2020	15	draft
SAMN24668373	HDDKT	China	sputum	Pneumoniae	2020	15	draft
SAMN24669135	LX2	China	sputum	Pneumoniae	2020	11	draft
SAMN24669136	LX3	China	sputum	Pneumoniae	2020	11	draft
SAMN24669138	LX4	China	sputum	Pneumoniae	2021	11	draft
SAMN24669140	LX5	China	blood	bloodstream infection	2021	15	draft
SAMN24669141	LX6	China	catheter	Bacteremia	2021	29	draft
